# Supplementary material for: A Phase II Study of Tumor-infiltrating Lymphocyte Therapy for Human Papillomavirus–associated Epithelial Cancers
Source: Oxford University Press journal article supplement (doi:10.1158/1078-0432.ccr-18-2722), 2018-12-05
Supplement: 10780432ccr182722-sup-207412_2_supp_5146818_phrwbr.doc [file 10780432ccr182722-sup-207412_2_supp_5146818_phrwbr.doc]

**DATA SUPPLEMENT - APPENDIX**

**Study Design and Patients**

Eligible patients in this study had measurable metastatic or locally advanced refractory/recurrent malignancies that were HPV-16 or HPV-18 positive or any cancer from the uterine cervix. Eligibility criteria were amended after treatment of 22 patients to only include patients with HPV-16 or HPV-18 positive cancers from any anatomic site. The timeline and outline of cell preparation, patient treatment and follow-up evaluations has been previously described.(1) Following treatment, patients were discharged from the hospital when they were medically stable and their blood counts recovered to adequate levels. Follow up assessments of adverse events and tumor response were conducted at predetermined intervals as previously described.(1) The Common Terminology Criteria for Adverse Events (CTCAE version 3.0) was used for toxicity and adverse event reporting. Duration of response or time to progression was measured from the time of cell infusion until date of progression using RECIST version 1.0 criteria. Patients were removed from the study upon disease progression. Follow-up following disease progression and long-term follow-up was at the discretion of the Principal Investigator.

**Generation of HPV-TIL cell products**

Forty-five patients underwent surgery for procurement of tumors for generation of TILs (Appendix Fig A1, online only). Sixteen patients were not treated for reasons indicated in Appendix Fig A1. Twenty-nine HPV-TIL cell products were generated for patient treatment (Table 1, Appendix Fig A1, online only). Cell products were generated as previously described.(1) The protocol was amended after treatment of 22 patients to only treat patients whose tumors were HPV-16 or HPV-18positive (see above) and who also had three or more TIL cultures with HPV oncoprotein reactivity, as measured by IFN- release.(1)

References

1. Stevanović S, Draper LM, Langhan MM, Campbell TE, Kwong ML, Wunderlich JR, et al. Complete regression of metastatic cervical cancer after treatment with human papillomavirus-targeted tumor-infiltrating T cells. J Clin Oncol. 2015;33:1543–50.
